# Supplementary material for: Resonance Rayleigh Scattering and SERS Spectral Detection of Trace Hg(II) Based on the Gold Nanocatalysis
Source: PubMed Central journal article supplement (PMC5449995; doi:10.3390/nano7050114), 2017-05-17
Supplement: nanomaterials-07-00114-s001.pdf [file nanomaterials-07-00114-s001.pdf]

# Resonance Rayleigh Scattering and SERS Spectral Detection of Trace Hg(II) Based on the Gold Nanocatalysis

Huixiang Ouyang<sup>1,2</sup>, Chongning Li<sup>1</sup>, Qinye Liu<sup>1</sup>, Guiqing Wen<sup>1</sup>, Aihui Liang<sup>1\*</sup>, Zhiliang Jiang<sup>1\*</sup>

<sup>1</sup>Key Laboratory of Ecology of Rare and Endangered Species and Environmental Protection of Ministry Education, Guangxi Key Laboratory of Environmental Pollution Control Theory and Technology, Guangxi Normal University, Guilin 541004, China; <sup>2</sup> Guangxi Colleges and Universities Key Laboratory of Regional Ecological Environment Analysis and Pollution Control of West Guangxi, College of Chemistry and Environment Engineering, Baise University, Baise 533000, China

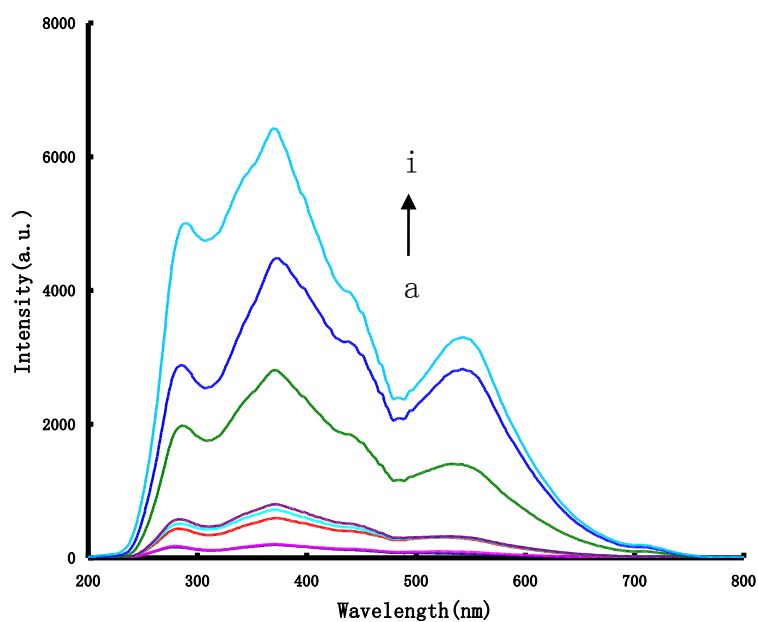

**Figure S1** RRS spectra of the AgNPs-HAuCl<sub>4</sub>-H<sub>2</sub>O<sub>2</sub> nanocatalytic system

(a) 4.48 μmol/L HAuCl<sub>4</sub> + 0.67 mmol/L HCl + 3.33 mmol/L H<sub>2</sub>O<sub>2</sub>; (b) a + 3.3 ng/mL AgNPs; (c) a + 6.6 ng/mL AgNPs; (d) a + 13.3 ng/mL AgNPs; (e) a + 33.2 ng/mL AgNPs; (f) a + 99.5 ng/mL AgNPs; (g) a + 133 ng/mL AgNPs; (h) a + 57 ng/mL AgNPs; (i) a + 265 ng/mL AgNPs.

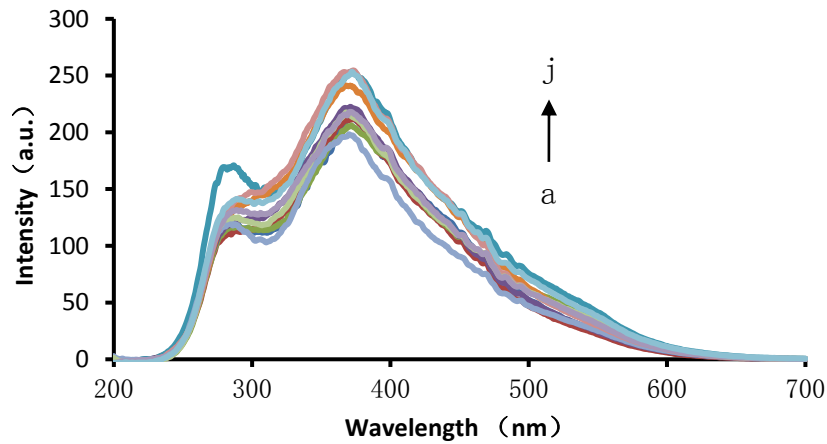

**Figure S2** RRS spectra of the  $\text{Hg}^{2+}$ -AuNP<sub>c</sub>-HAuCl<sub>4</sub>-H<sub>2</sub>O<sub>2</sub> system

(a) 38 ng/mL AuNP<sub>b</sub> + 4.48  $\mu\text{mol/L}$  HAuCl<sub>4</sub> + 0.67 mmol/L HCl + 3.33 mmol/L H<sub>2</sub>O<sub>2</sub>, 15 min at room temperature; (b) a + 0.013  $\mu\text{mol/L}$  Hg<sup>2+</sup>; (c) a + 0.17  $\mu\text{mol/L}$  Hg<sup>2+</sup>; (d) a + 0.67  $\mu\text{mol/L}$  Hg<sup>2+</sup>; (e) a + 0.83  $\mu\text{mol/L}$  Hg<sup>2+</sup>; (f) a + 1.17  $\mu\text{mol/L}$  Hg<sup>2+</sup>; (g) a + 1.33  $\mu\text{mol/L}$  Hg<sup>2+</sup>; (h) a + 3  $\mu\text{mol/L}$  Hg<sup>2+</sup>; (i) a + 6  $\mu\text{mol/L}$  Hg<sup>2+</sup>; (j) a + 12  $\mu\text{mol/L}$  Hg<sup>2+</sup>.

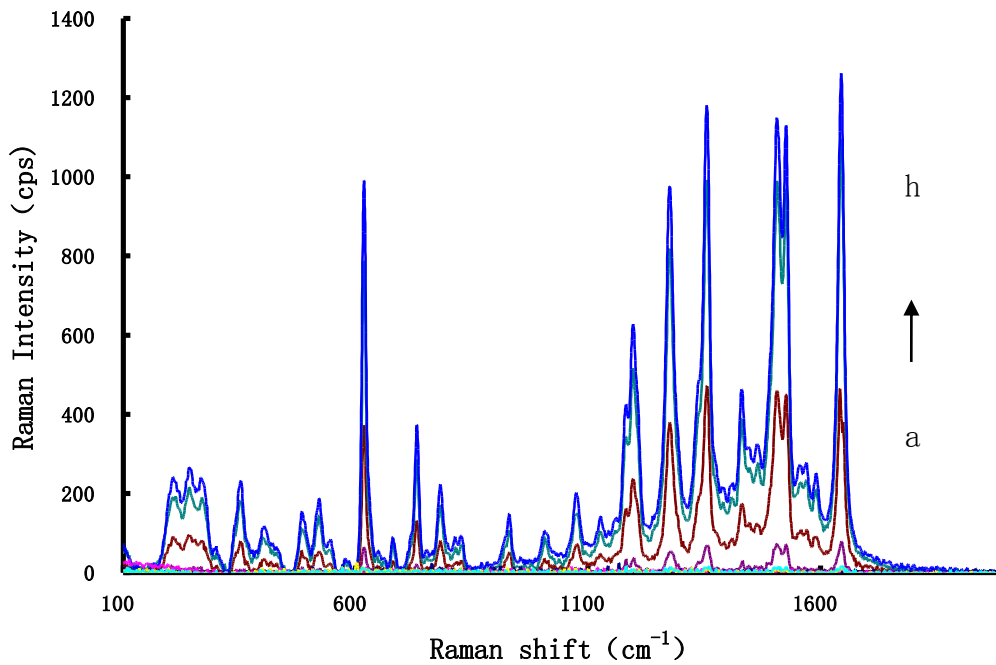

**Figure S3** SERS spectra of the AuNP<sub>b</sub>-HAuCl<sub>4</sub>-H<sub>2</sub>O<sub>2</sub>-RhS system

(a) 4.48  $\mu\text{mol/L}$  HAuCl<sub>4</sub> + 0.67 mmol/L HCl + 3.33 mmol/L H<sub>2</sub>O<sub>2</sub> + 0.70  $\mu\text{mol/L}$  RhS (b) a + 3.8 ng/mL AuNP<sub>b</sub>; (c) a + 19 ng/mL AuNP<sub>b</sub>; (d) a + 38 ng/mL AuNP<sub>b</sub>; (e) a + 95 ng/mL AuNP<sub>b</sub>; (f) a + 190 ng/mL AuNP<sub>b</sub>; (g) a + 380 ng/mL AuNP<sub>b</sub>; (h) a + 456 ng/mL AuNP<sub>b</sub>;

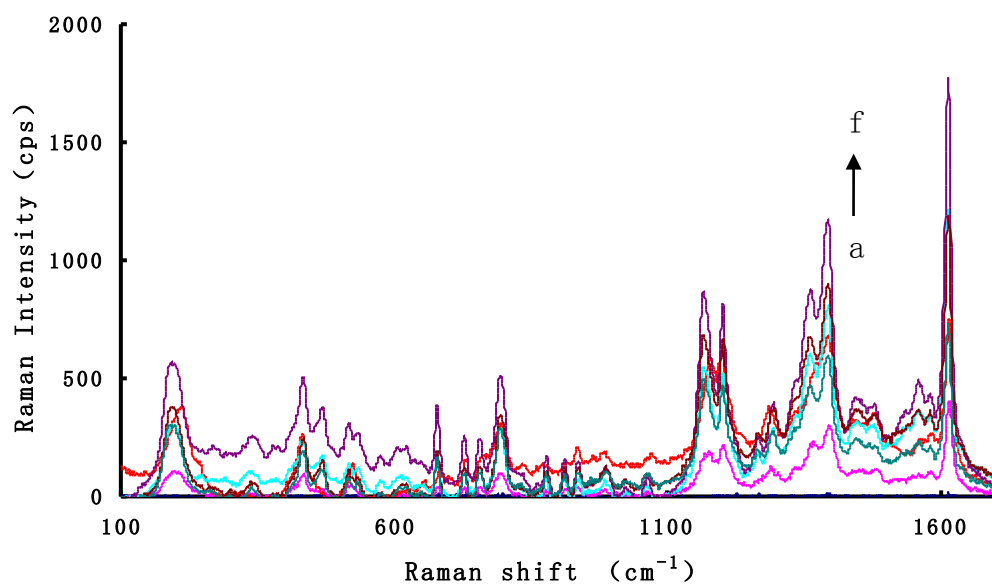

**Figure S4** SERS spectra of the AuNP<sub>b</sub>-HAuCl<sub>4</sub>-H<sub>2</sub>O<sub>2</sub>-VBB system

(a) 4.48 μmol/L HAuCl<sub>4</sub>+0.67 mmol/L HCl+3.33 mmol/L H<sub>2</sub>O<sub>2</sub> +1.3 μmol/L VBB (b) a+19 ng/mL AuNP<sub>b</sub>; (c) a+38 ng/mL AuNP<sub>b</sub>; (d) a+95 ng/mL AuNP<sub>b</sub>; (e) a+190 ng/mL AuNP<sub>b</sub>; (f) a+285 ng/mL AuNP<sub>b</sub>;

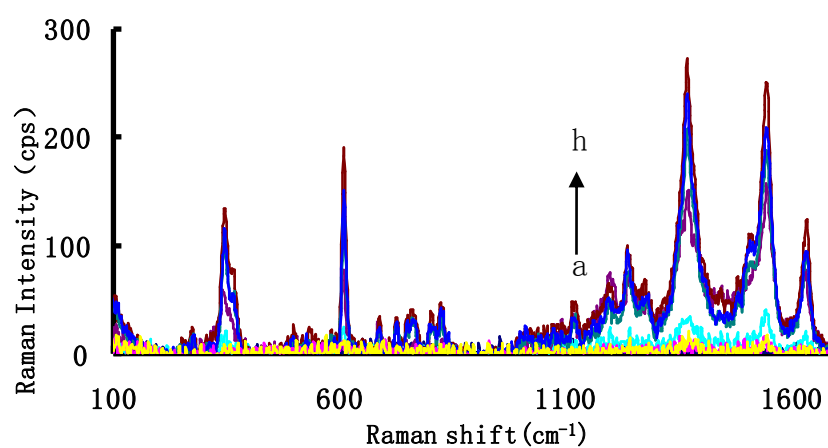

**Figure S5** SERS spectra of the AuNP<sub>b</sub>-HAuCl<sub>4</sub>-H<sub>2</sub>O<sub>2</sub>- Safranin T system

(a) 4.48 μmol/L HAuCl<sub>4</sub>+0.67 mmol/L HCl+3.33 mmol/L H<sub>2</sub>O<sub>2</sub> +6.7 mmol/L Safranin T (b) a+3.8 ng/mL AuNP<sub>b</sub>; (c) a+19 ng/mL AuNP<sub>b</sub>; (d) a+38 ng/mL AuNP<sub>b</sub>; (e) a+95 ng/mL AuNP<sub>b</sub>; (f) a+190 ng/mL AuNP<sub>b</sub>; (g) a+295 ng/mL AuNP<sub>b</sub>; (h) a+380 ng/mL AuNP<sub>b</sub>;

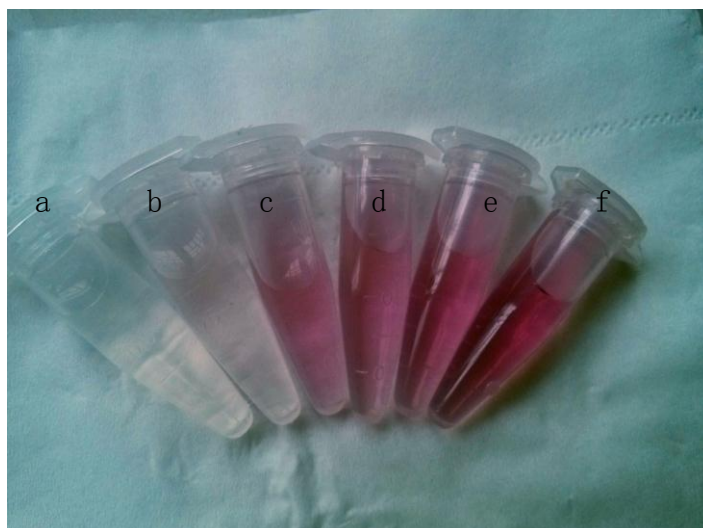

**Figure S6** The color change of the AuNP<sub>6</sub>-HAuCl<sub>4</sub>-H<sub>2</sub>O<sub>2</sub> system

(a) 4.48 μmol/L HAuCl<sub>4</sub>+0.67 mmol/L HCl+3.33 mmol/L H<sub>2</sub>O<sub>2</sub>; (b) a+19 ng/mL AuNP<sub>6</sub>; (c) a+95 ng/mL AuNP<sub>6</sub>; (d) a+285 ng/mL AuNP<sub>6</sub>; (e) a+380 ng/mL AuNP<sub>6</sub>; (f) a+760 ng/mL AuNP<sub>6</sub>.

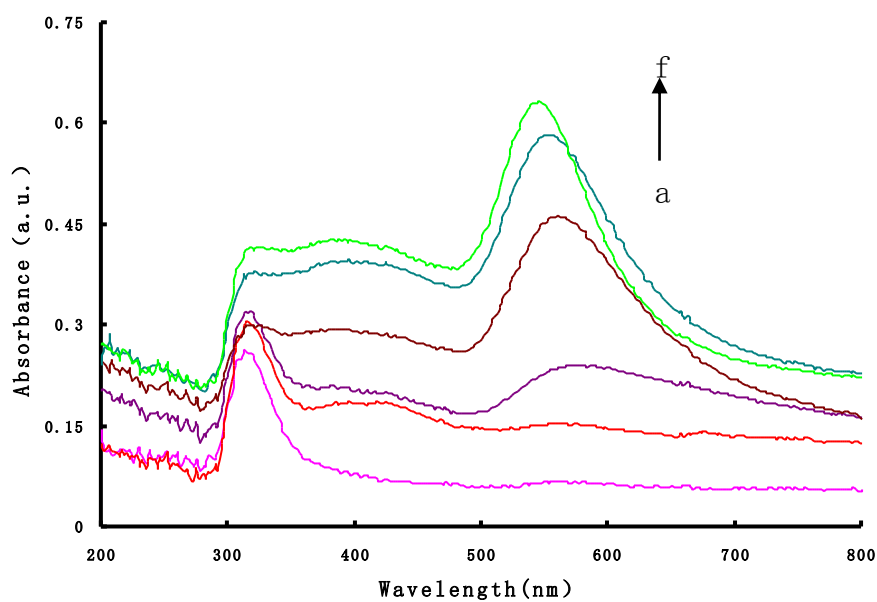

**Figure S7** Absorption spectra of the AuNP<sub>6</sub>-HAuCl<sub>4</sub>-H<sub>2</sub>O<sub>2</sub> system

(a) 4.48 μmol/L HAuCl<sub>4</sub>+0.67 mmol/L HCl+3.33 mmol/L H<sub>2</sub>O<sub>2</sub> (b) a+9.5 ng/mL AuNP<sub>6</sub>; (c) a+38 ng/mL AuNP<sub>6</sub>; (d) a+133 ng/mL AuNP<sub>6</sub>; (e) a+190 ng/mL AuNP<sub>6</sub>; (f) a+380 ng/mL AuNP<sub>6</sub>.

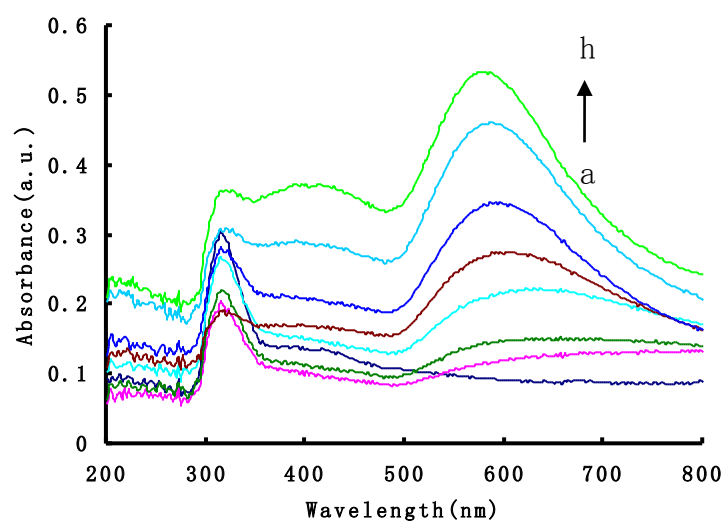

**Figure S8** Absorption spectra of the AuNP<sub>c</sub>-HAuCl<sub>4</sub>-H<sub>2</sub>O<sub>2</sub> system

(a) 4.48 μmol/L HAuCl<sub>4</sub>+0.67 mmol/L HCl+3.33 mmol/L H<sub>2</sub>O<sub>2</sub> (b) a+38 ng/mL AuNP<sub>c</sub>; (c) a+57 ng/mL AuNP<sub>c</sub>; (d) a+85.5 ng/mL AuNP<sub>c</sub>; (e) a+133 ng/mL AuNP<sub>c</sub>; (f) a+152 ng/mL AuNP<sub>c</sub>; (g) a+190 ng/mL AuNP<sub>c</sub>; (h) a+228 ng/mL AuNP<sub>c</sub>

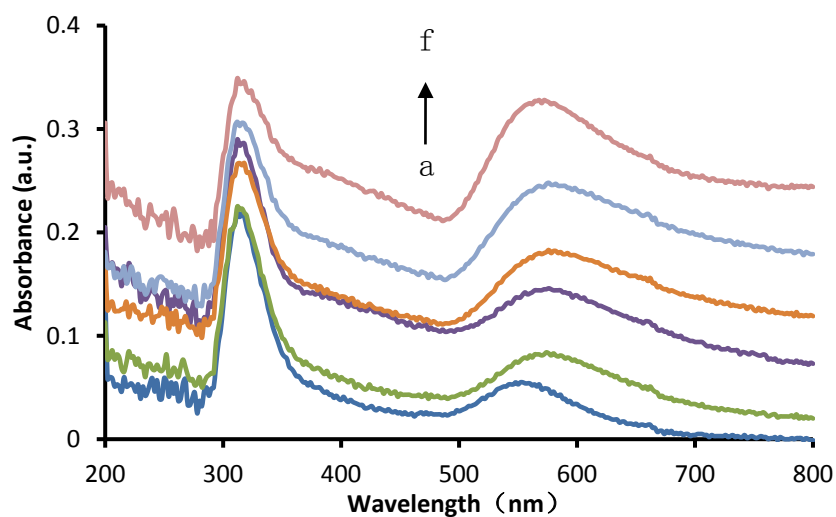

**Figure S9** Absorption spectra of the AgNP<sub>c</sub>-HAuCl<sub>4</sub>-H<sub>2</sub>O<sub>2</sub> system

(a) 4.48 μmol/L HAuCl<sub>4</sub>+0.67 mmol/L HCl+3.33 mmol/L H<sub>2</sub>O<sub>2</sub> (b) a+13 ng/mL AgNP<sub>c</sub>; (c) a+60 ng/mL AgNP<sub>c</sub>; (d) a+100 ng/mL AgNP<sub>c</sub>; (e) a+166 ng/mL AgNP<sub>c</sub>; (f) a+265 ng/mL AgNP<sub>c</sub>

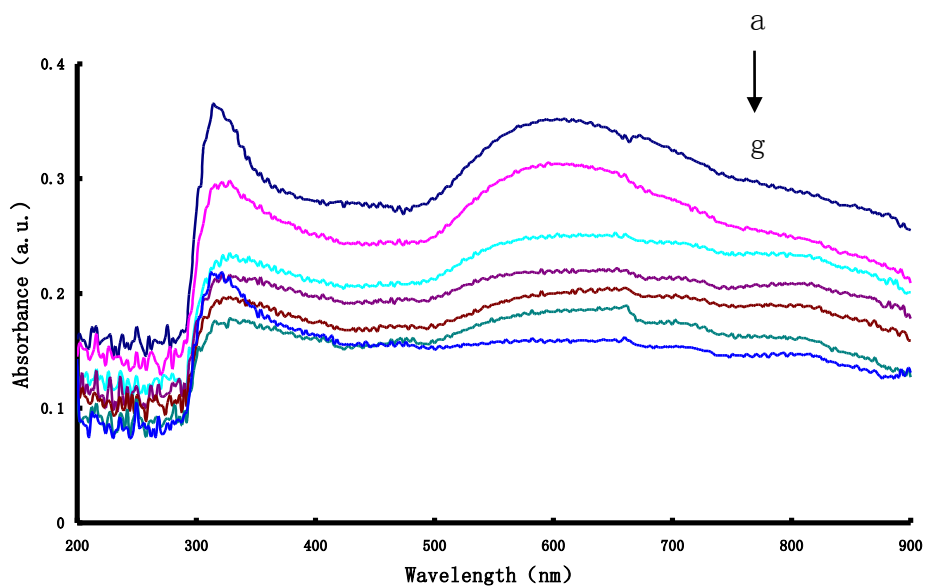

**Figure S10** Absorption spectra of the  $\text{Hg}^{2+}$ -AuNP<sub>c</sub>-HAuCl<sub>4</sub>-H<sub>2</sub>O<sub>2</sub> system

(a) 38ng/mL AuNP<sub>c</sub> + 4.48  $\mu\text{mol/L}$  HAuCl<sub>4</sub> + 0.67 mmol/L HCl + 3.33 mmol/L H<sub>2</sub>O<sub>2</sub> (b) a + 0.5  $\mu\text{mol/L}$  Hg<sup>2+</sup>; (c) a + 0.83  $\mu\text{mol/L}$  Hg<sup>2+</sup>; (d) a + 1.00  $\mu\text{mol/L}$  Hg<sup>2+</sup>; (e) a + 1.33  $\mu\text{mol/L}$  Hg<sup>2+</sup>; (f) a + 2.00  $\mu\text{mol/L}$  Hg<sup>2+</sup>; (g) a + 2.33  $\mu\text{mol/L}$  Hg<sup>2+</sup>; (h) a + 2.67  $\mu\text{mol/L}$  Hg<sup>2+</sup>.

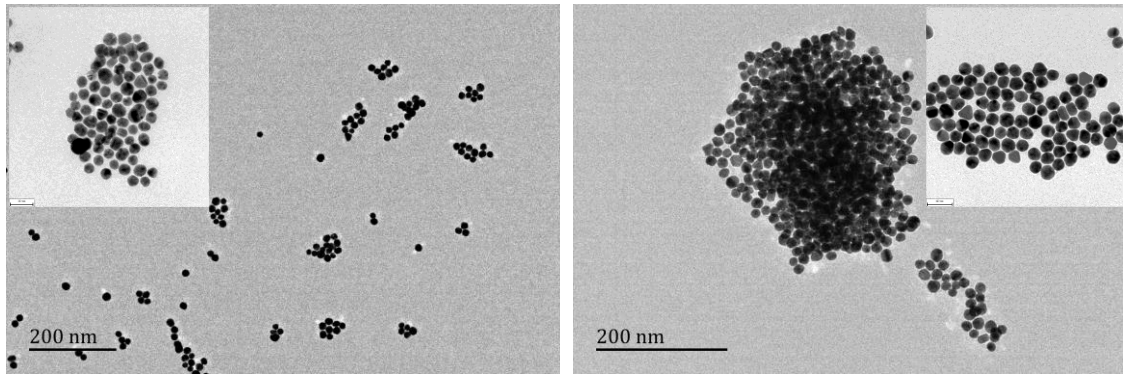

a

b

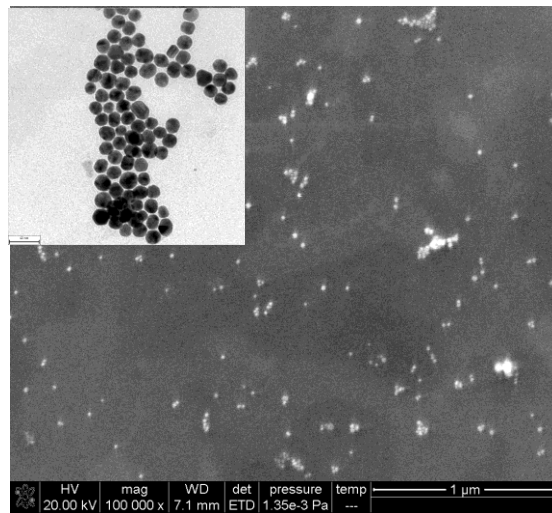

c

Figure S11. The TEM images for AuNP<sub>b</sub>(a), AuNP<sub>c</sub>(b) and Ag NPs (c).

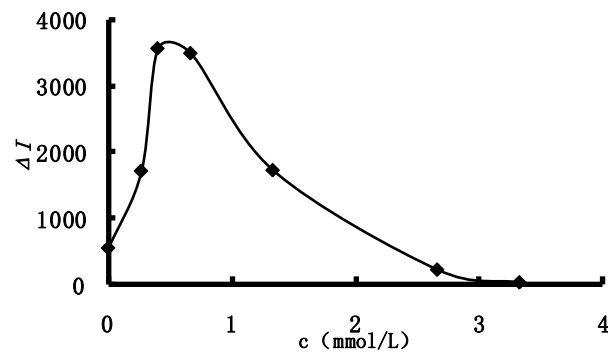

Figure S12 Effect of HCl concentration

2.24 μmol/L H<sub>2</sub>AuCl<sub>4</sub><sup>-</sup> HCl-3.33 mmol/L H<sub>2</sub>O<sub>2</sub>-152 ng/mL AuNP<sub>b</sub>;

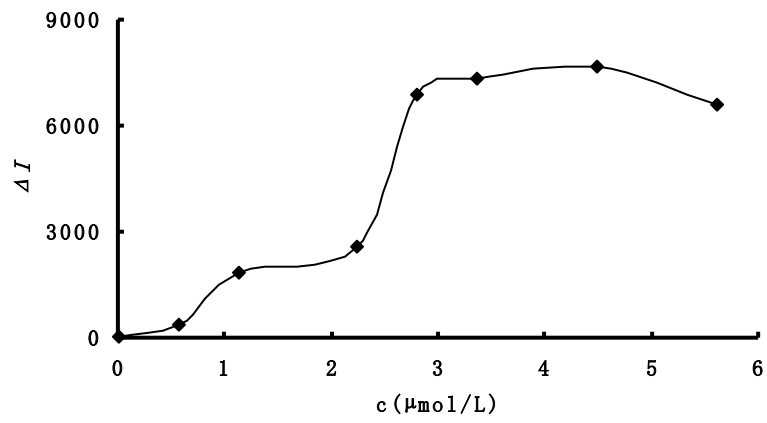

**Figure S13** Effect of HAuCl<sub>4</sub> concentration

HAuCl<sub>4</sub>- 0.67mmol/L HCl-3.33mmol/L H<sub>2</sub>O<sub>2</sub>-152ng/mL AuNP<sub>6</sub>.

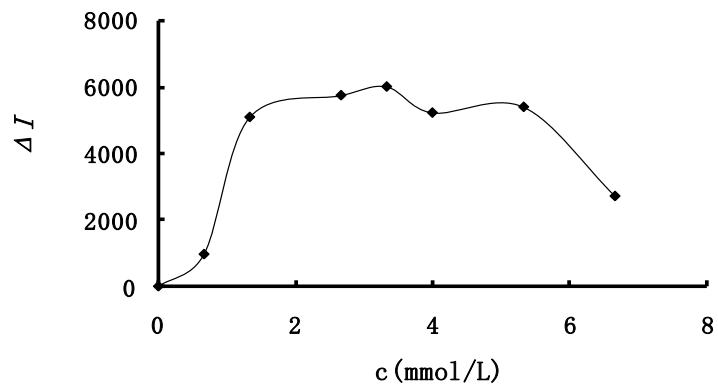

**Figure S14** Effect of H<sub>2</sub>O<sub>2</sub> concentration

4.48μmol/L HAuCl<sub>4</sub>- 0.67mmol/L HCl-H<sub>2</sub>O<sub>2</sub>-152ng/mL AuNP<sub>6</sub>.



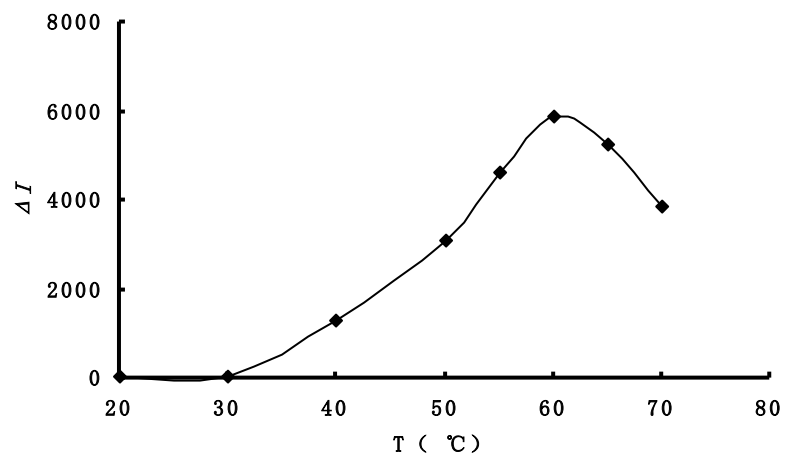

**Figure S15** Effect of temperature

4.48 $\mu$ mol/L HAuCl<sub>4</sub>- 0.67mmol/L HCl-3.33mmol/L H<sub>2</sub>O<sub>2</sub>-152ng/mL AuNP<sub>6</sub>;

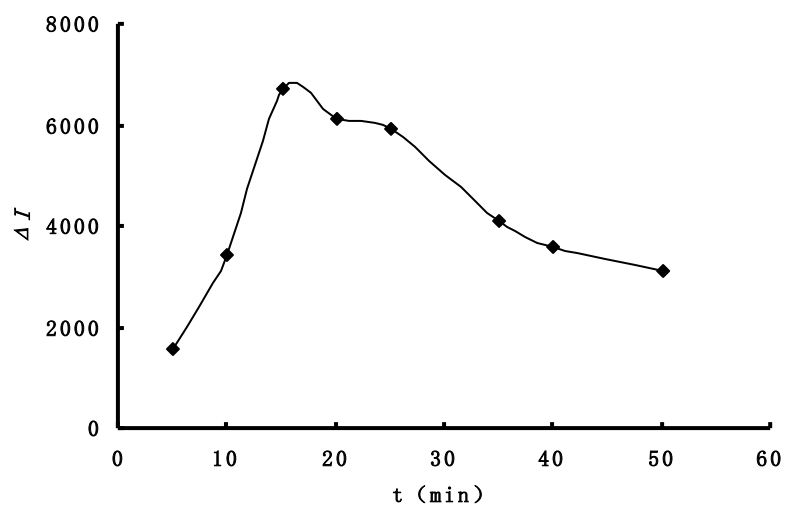

**Figure S16** Effect of heating time

4.48 $\mu$ mol/L HAuCl<sub>4</sub>- 0.67mmol/L HCl-3.33mmol/L H<sub>2</sub>O<sub>2</sub>-152ng/mL AuNP<sub>6</sub>;

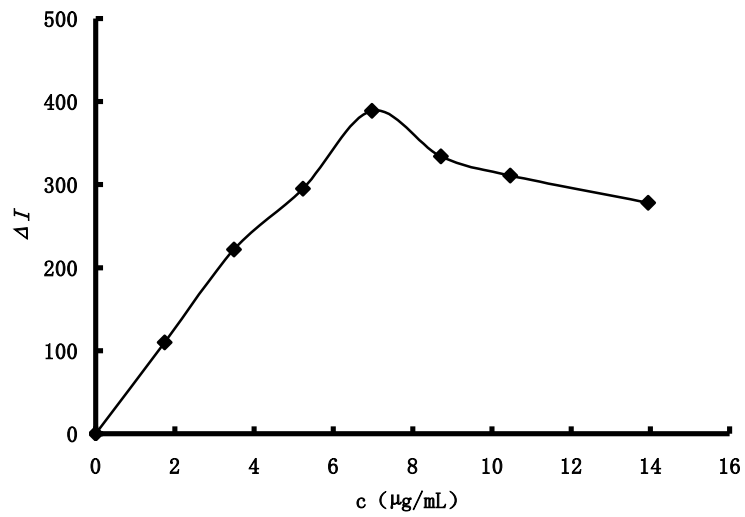

**Figure S17** Effect of RhS SERS probe concentration

4.48µmol/L HAuCl<sub>4</sub>- 0.67mmol/L HCl-3.33mmol/L H<sub>2</sub>O<sub>2</sub>-190ng/mL AuNP<sub>1</sub>-RhS;

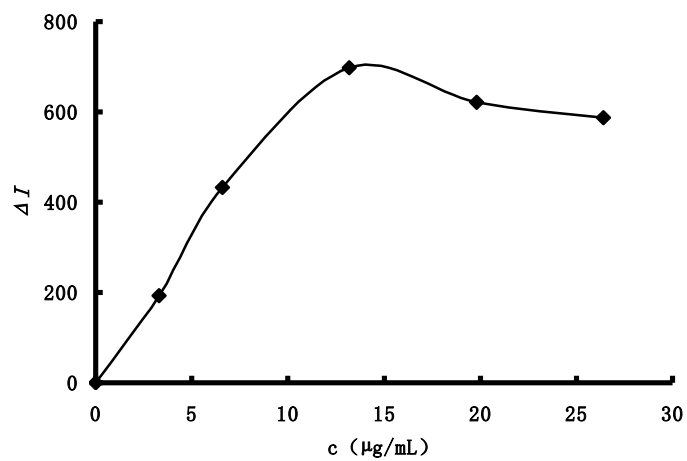

**Figure S18** Effect of VBB SERS probe concentration

4.48µmol/L HAuCl<sub>4</sub>- 0.67mmol/L HCl-3.33mmol/L H<sub>2</sub>O<sub>2</sub>-190ng/mL AuNP<sub>1</sub>-VBB;

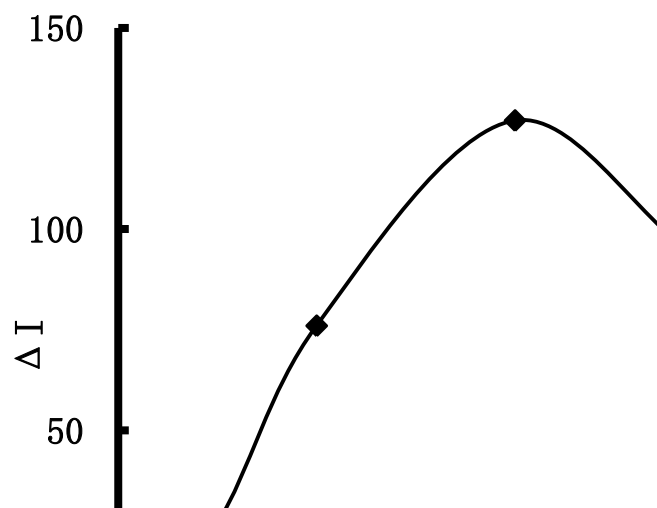

Figure S19 Effect of safranin T SERS probe concentration.

4.48 μmol/L HAuCl<sub>4</sub>- 0.67 mmol/L HCl-3.33 mmol/L H<sub>2</sub>O<sub>2</sub>-190 ng/mL AuNP<sub>b</sub>- safranin T.

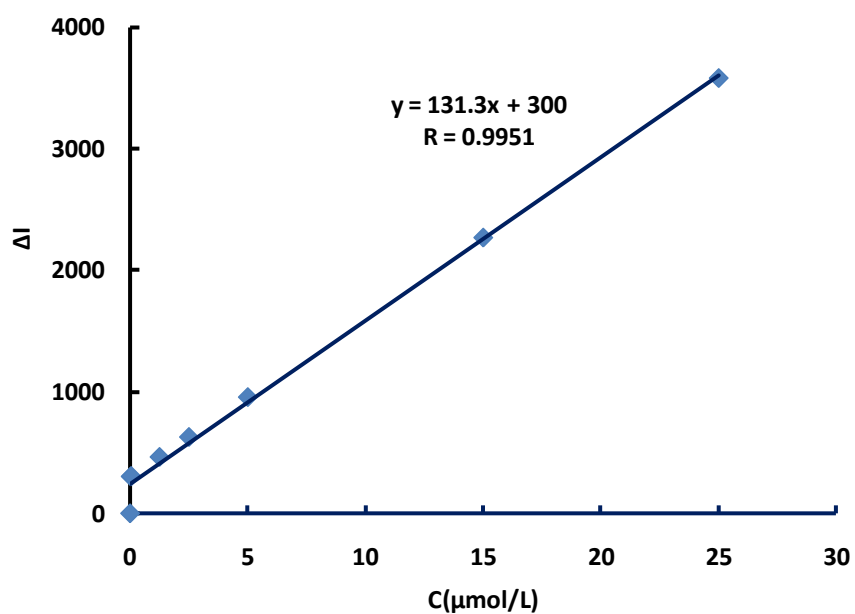

Figure S20 Working curve for RRS detection of AuNP<sub>b</sub>

4.48 μmol/L HAuCl<sub>4</sub>-0.67 mmol/L HCl-3.33 mmol/L H<sub>2</sub>O<sub>2</sub>-AuNP<sub>b</sub>.

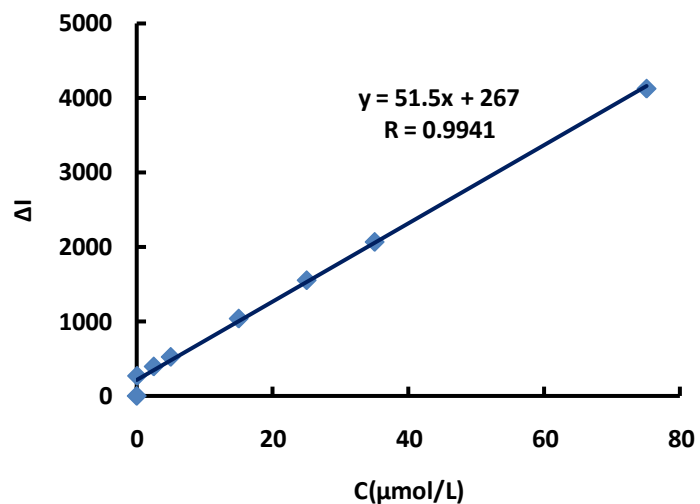

**Figure S21 Working curve for SERS detection of AuNP<sub>c</sub>**  
4.48 μmol/L H<sub>2</sub>O<sub>2</sub>-AuNP<sub>c</sub>, 0.67 mmol/L HCl, 3.33 mmol/L H<sub>2</sub>O<sub>2</sub>, 4.48 μmol/L H<sub>2</sub>O<sub>2</sub>-AuNP<sub>c</sub>.

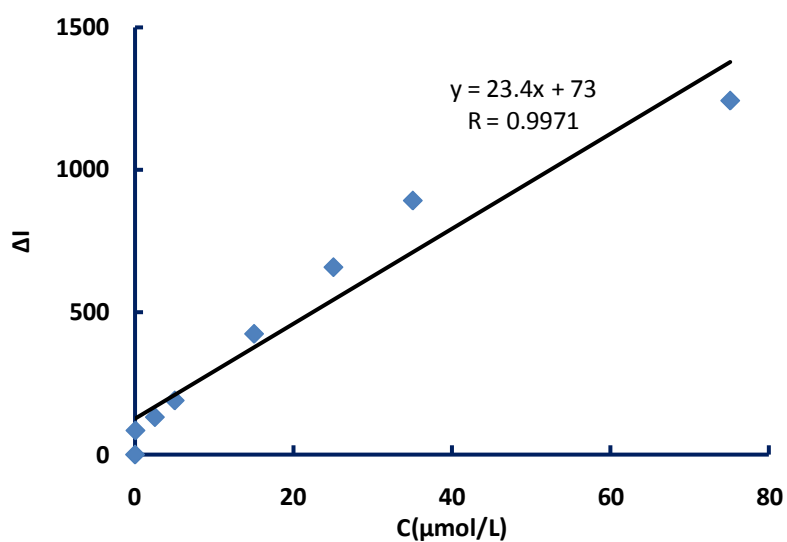

**Figure S22 Working curve for SERS detection of AgNP**  
4.48 μmol/L H<sub>2</sub>O<sub>2</sub>-AgNP, 0.67 mmol/L HCl, 3.33 mmol/L H<sub>2</sub>O<sub>2</sub>, 4.48 μmol/L H<sub>2</sub>O<sub>2</sub>-AgNP.

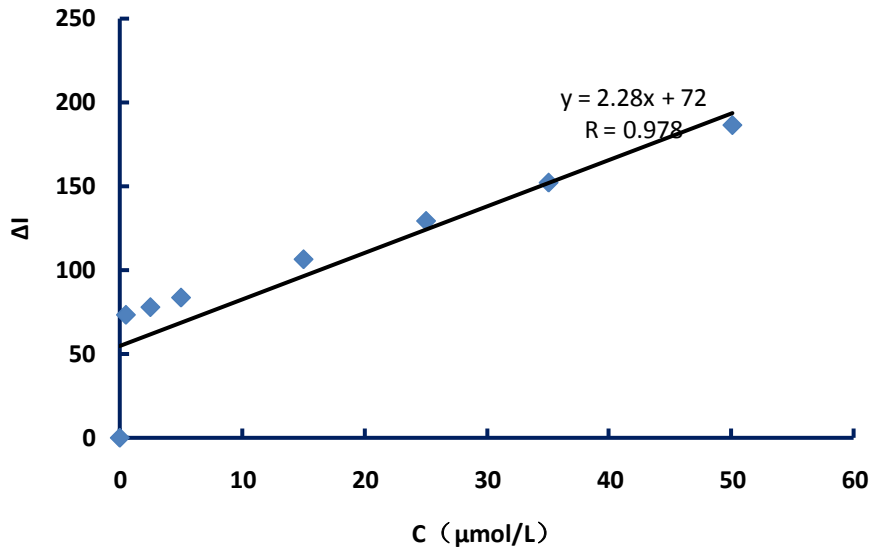

**Figure S23 Working curve for SERS detection of AuNP<sub>b</sub> with RhS probe**  
 4.48 μmol/L H<sub>2</sub>SO<sub>4</sub>-0.67 mmol/L HCl-3.33 mmol/L H<sub>2</sub>O<sub>2</sub>-AuNP<sub>B</sub>-6.97 μmol/L RhS.

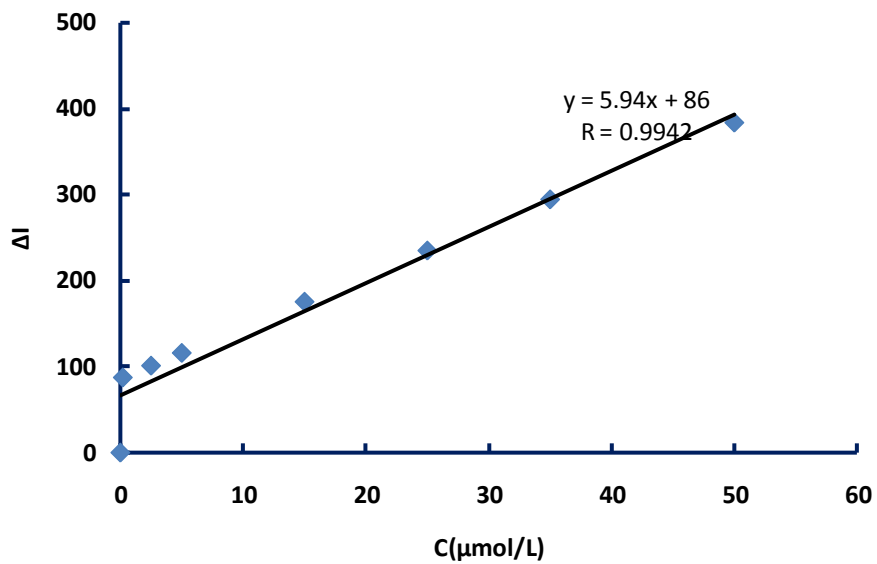

**Figure S24 Working curve for SERS detection of AuNP<sub>b</sub> with VBB probe**  
 4.48 μmol/L H<sub>2</sub>SO<sub>4</sub>-0.67 mmol/L HCl-3.33 mmol/L H<sub>2</sub>O<sub>2</sub>-AuNP<sub>B</sub>-1.3 μmol/L VBB

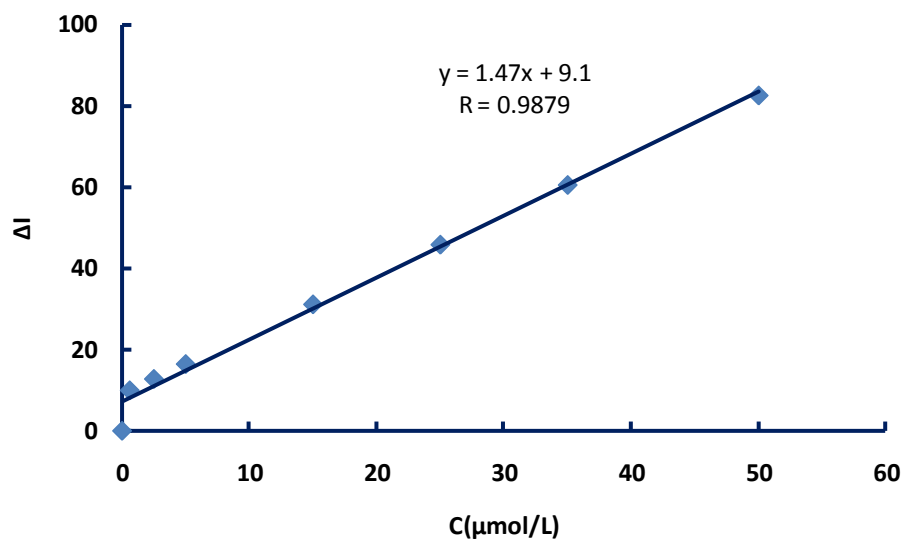

**Figure S25 Working curve for SERS detection of AuNP<sub>b</sub> with safranin T probe**  
 4.48 μmol/L H<sub>2</sub>SO<sub>4</sub>-0.67 mmol/L HCl-3.33 mmol/L H<sub>2</sub>O<sub>2</sub>-AuNP<sub>B</sub>-6.7 mmol/L safranin T.

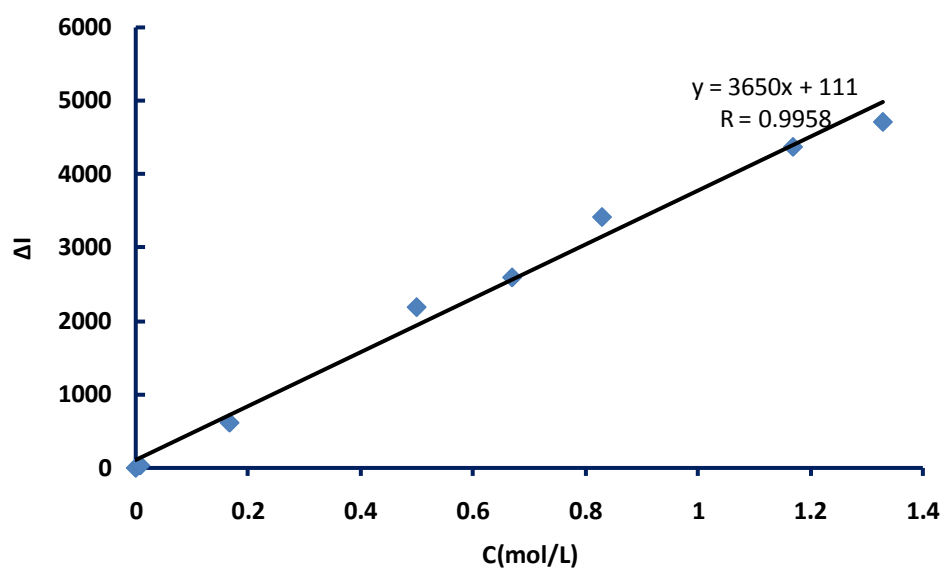

**Figure S26 Working curve for RRS detection of Hg<sup>2+</sup>.**  
 4.48 μmol/L H<sub>2</sub>SO<sub>4</sub>+0.67 mmol/L HCl+3.33 mmol/L H<sub>2</sub>O<sub>2</sub>-38 ng/mL AuNP<sub>B</sub>-Hg<sup>2+</sup>

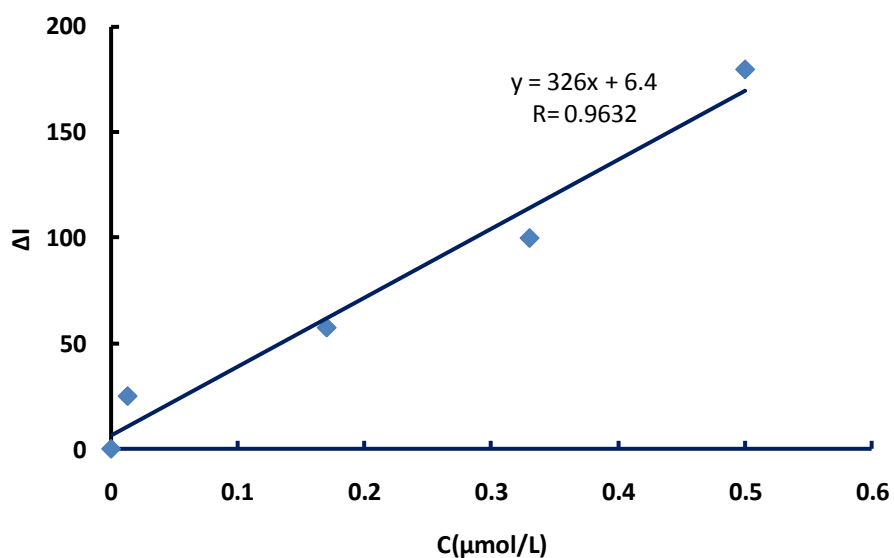

**Figure S27 Working curve for SERS detection of  $\text{Hg}^{2+}$ .**

4.48 μmol/L  $\text{HAuCl}_4$  + 0.67 mmol/L  $\text{HCl}$  + 3.33 mmol/L  $\text{H}_2\text{O}_2$  - 38 ng/mL  $\text{AuNP}_B$  - 1.3 μmol/L VBB -  $\text{Hg}^{2+}$

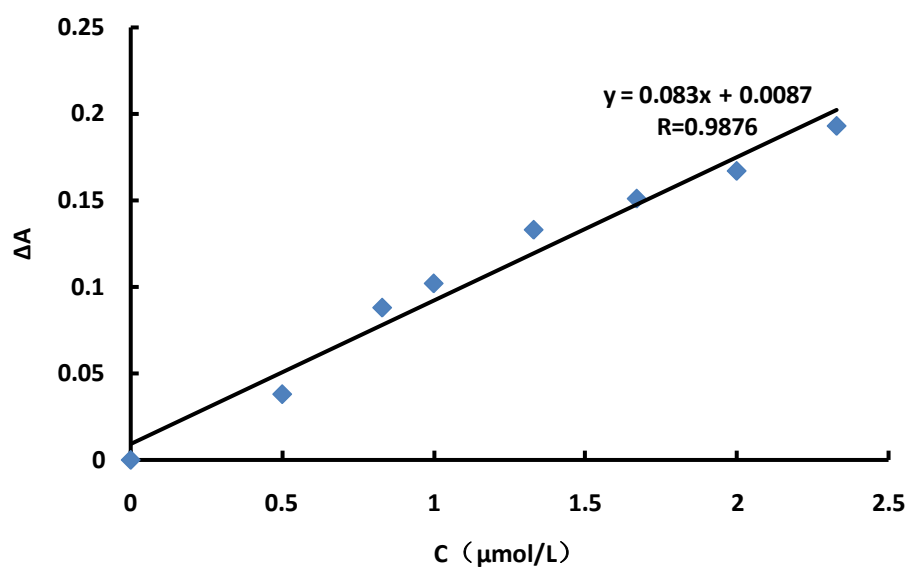

**Figure S28 Working curve for Abs detection of  $\text{Hg}^{2+}$ .**

4.48 μmol/L  $\text{HAuCl}_4$  + 0.67 mmol/L  $\text{HCl}$  + 3.33 mmol/L  $\text{H}_2\text{O}_2$  - 38 ng/mL  $\text{AuNP}_B$  -  $\text{Hg}^{2+}$

**Table S1** Results for the determination of Hg<sup>2+</sup> in water samples (n=5)

| <b>Sample</b> | <b>Hg<sup>2+</sup> content<br/>(nmol/L)</b> | <b>Added Hg<sup>2+</sup><br/>(nmol/L)</b> | <b>Found Hg<sup>2+</sup><br/>(nmol/L)</b> | <b>Recovery<br/>(%)</b> | <b>RSD<br/>(%)</b> | <b>AAS<br/>(nmol/L)</b> |
|---------------|---------------------------------------------|-------------------------------------------|-------------------------------------------|-------------------------|--------------------|-------------------------|
| Tap           | 13.8                                        | 10                                        | 10.2                                      | 102                     | 5.2                | 13.4                    |
| River         | 16.8                                        | 10                                        | 9.70                                      | 97.0                    | 4.8                | 17.2                    |
| Pond          | 21.5                                        | 10                                        | 9.85                                      | 98.5                    | 4.5                | 23.1                    |
